# Supplementary material
Source: publisher site journal article supplement (https://www.dovepress.com/article/266568)

**SUPPLEMENTARY MATERIAL**

**Supplementary Figure 1.** Incidence rate of metabolic syndrome according to ATP-III and IDF definitions stratifying by age groups categorized in <35 years, 35-50 years and >50 years.


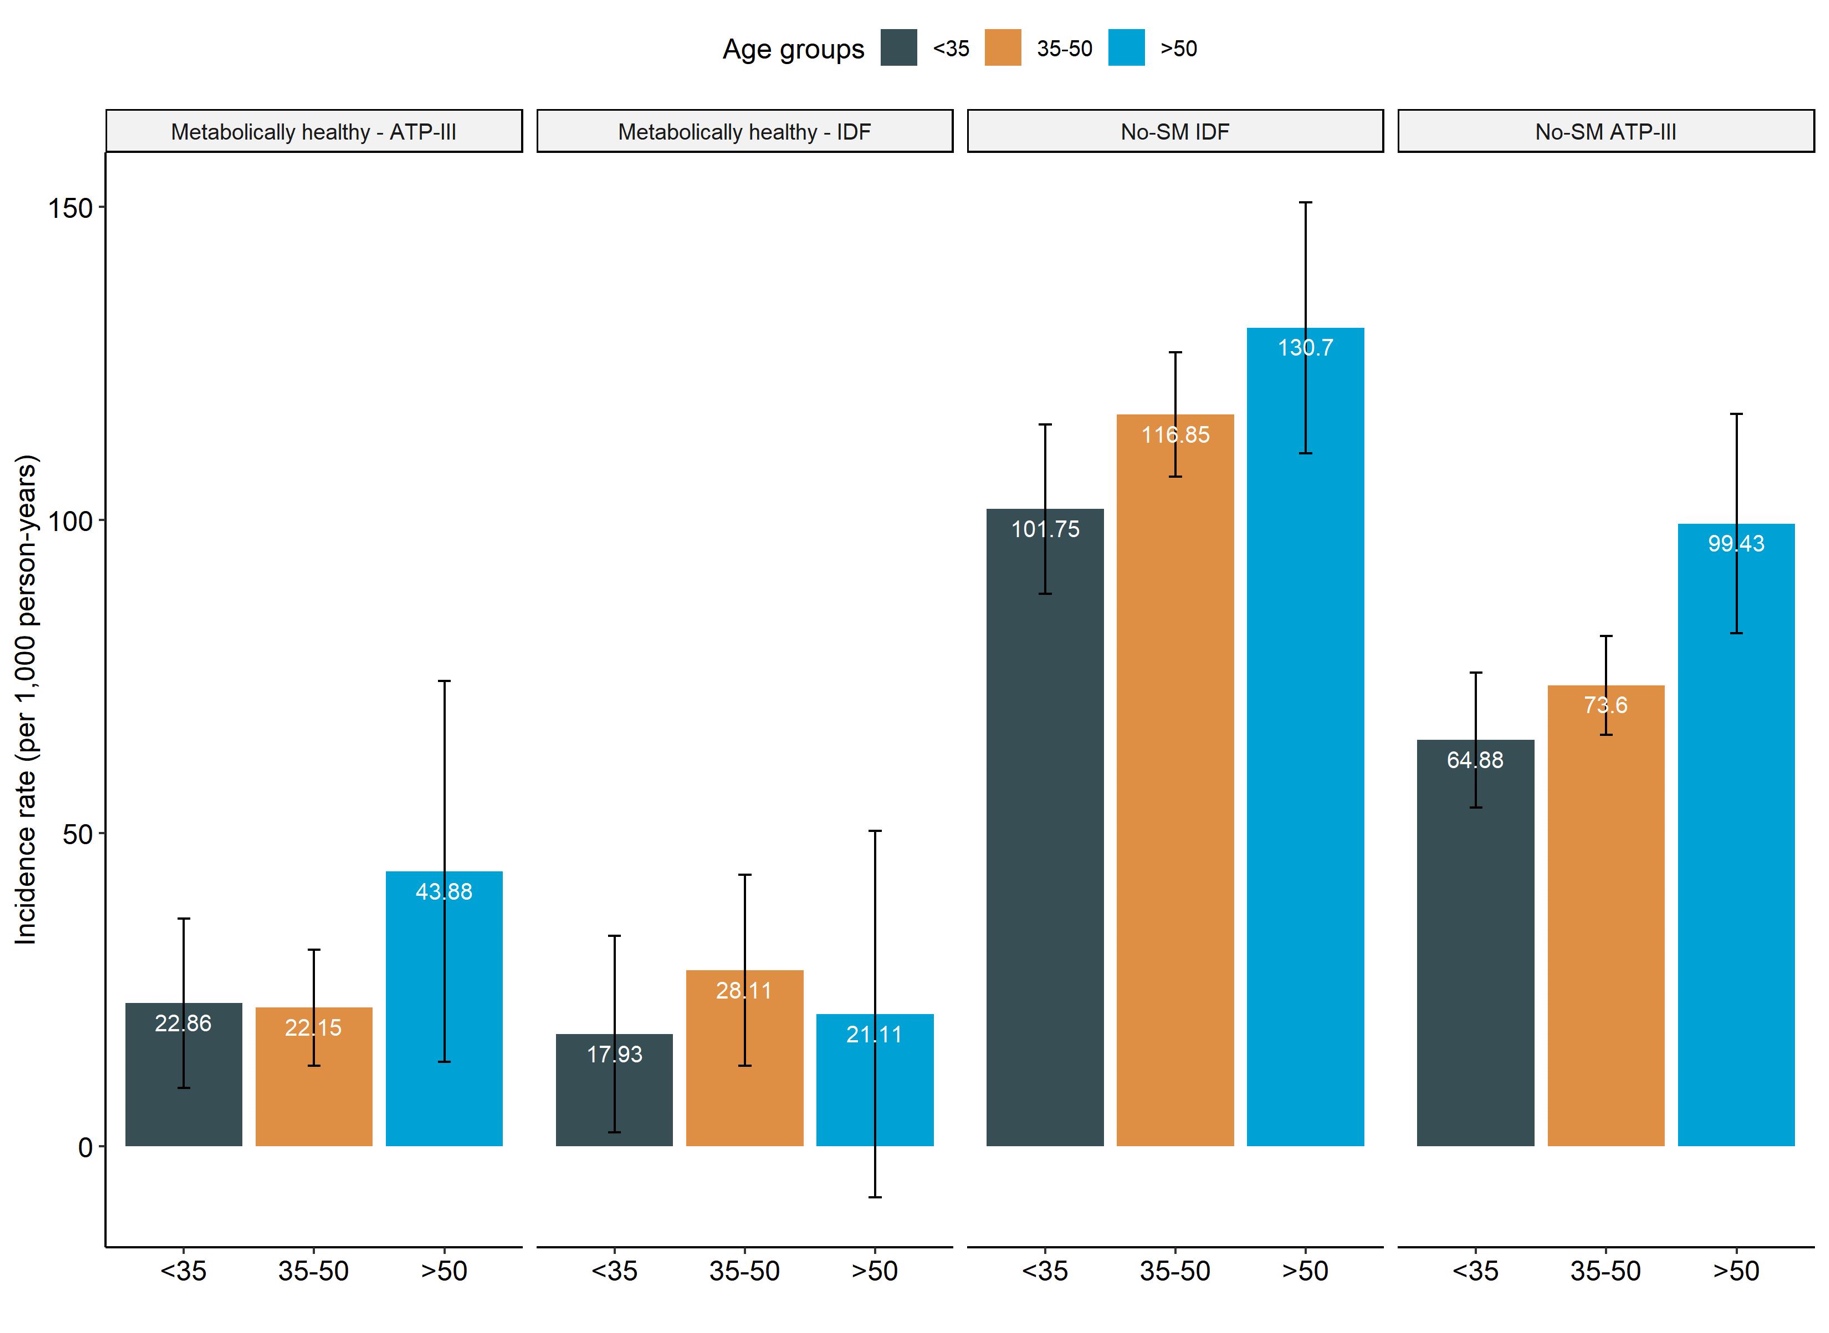


**Supplementary Figure 2**. Incidence rate of metabolic syndrome according to ATP-III and IDF definitions stratifying sex in the MS cohort.


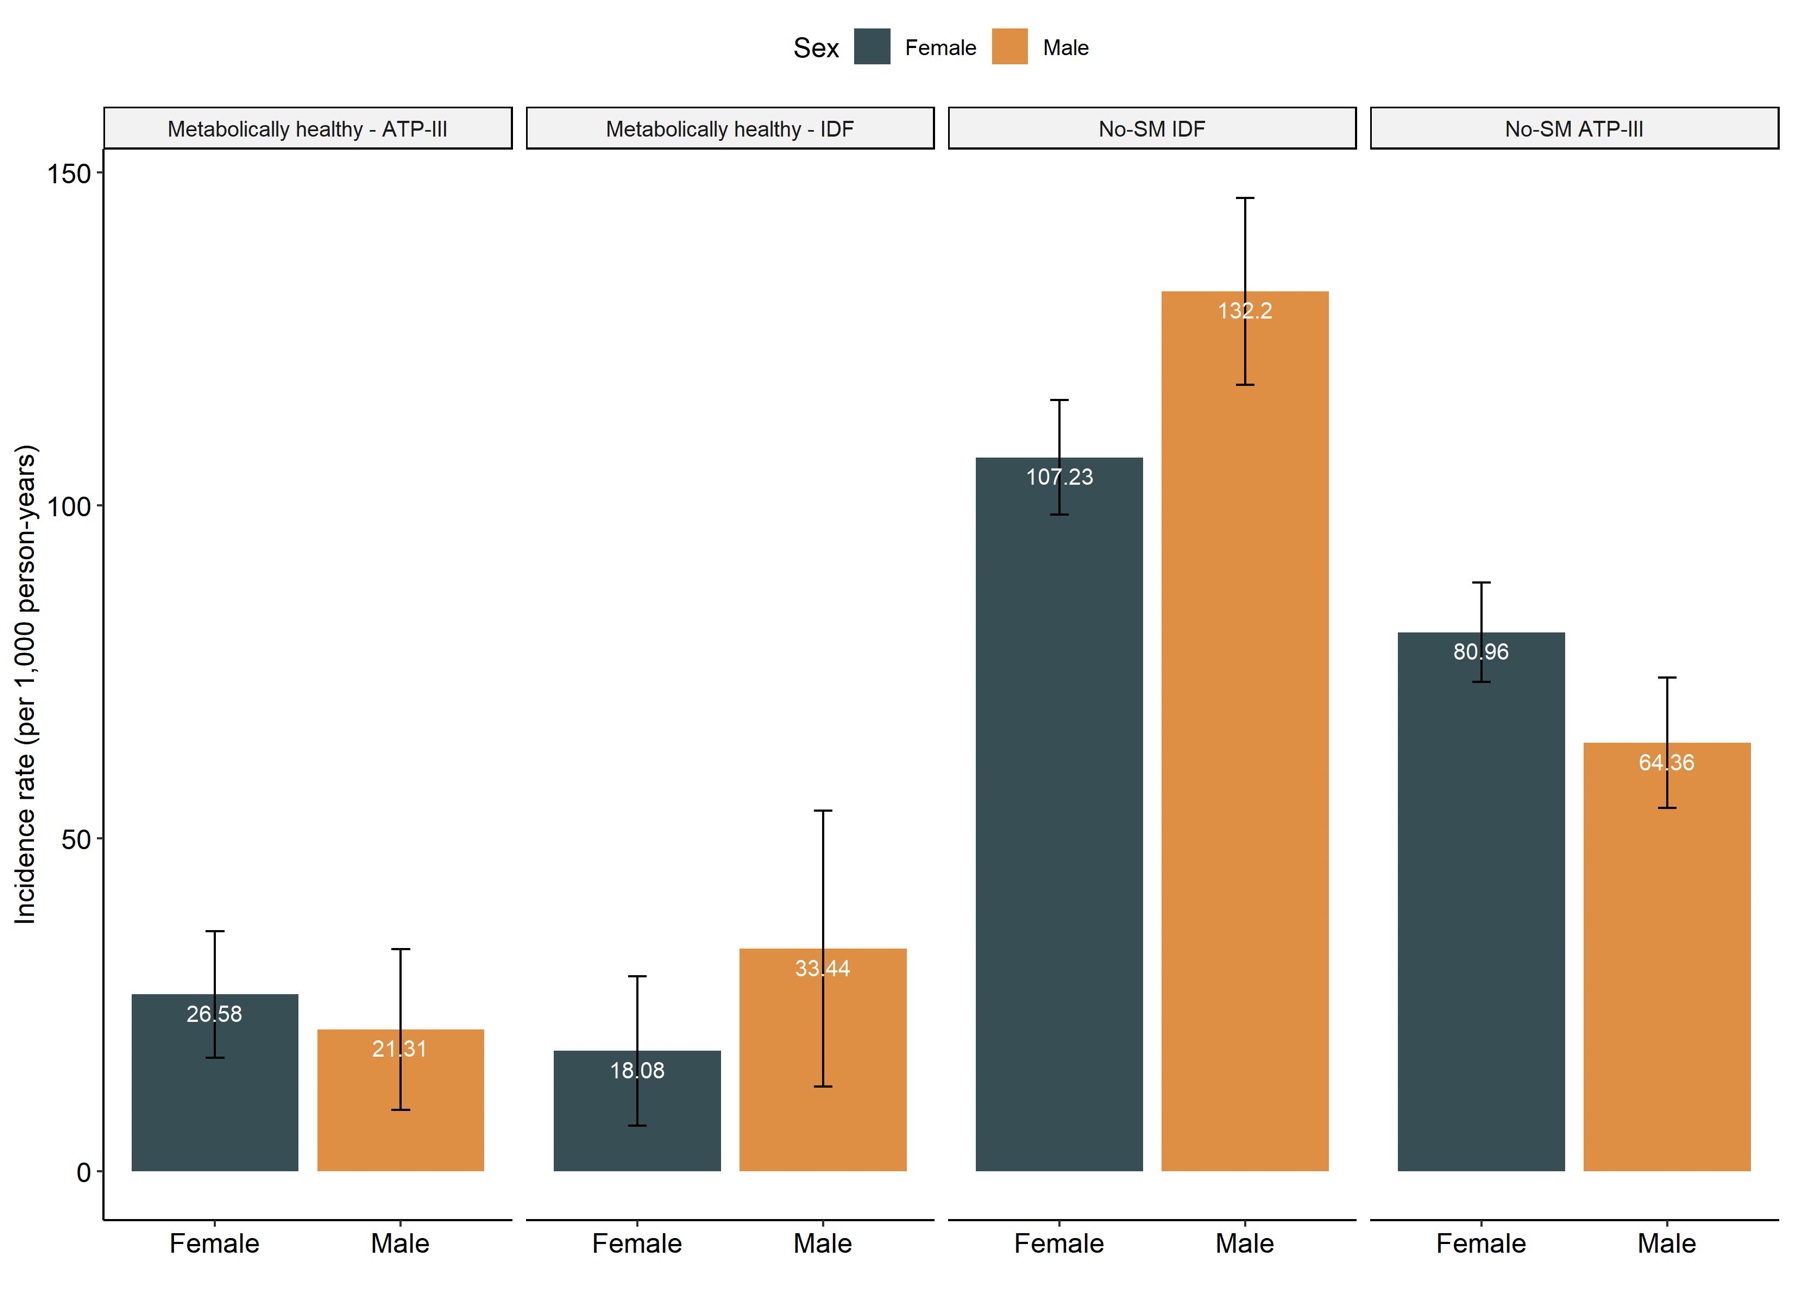

Supplement: Supplementary file 1 [file get_supplementary_file.php]
